# Supplementary material for: Elucidating and exploiting the chemistry of Keggin heteropolyacids in the methanol-to-DME conversion: enabling the bulk reaction thanks to operando Raman
Source: Royal Society of Chemistry journal article supplement (doi:10.1039/c6cy02264b), 2016-12-01
Supplement: c6cy02264b1.pdf [file c6cy02264b1.pdf]

## Elucidating and exploiting the chemistry of Keggin heteropolyacids in the methanol-to-DME conversion: enabling the bulk reaction thanks to *operando* Raman

Josefine Schnee, Eric M. Gaigneaux\*

Institute of Condensed Matter and Nanosciences (IMCN) – MOlecules Solids and reactiviTy (MOST) – Université catholique de Louvain (UCL). Place Louis Pasteur 1, box L4.01.09 1348 Louvain-la-Neuve, Belgium.

\*Corresponding author. E-mail address: eric.gaigneaux@uclouvain.be.

### Supplementary Information

*Thermogravimetric and thermodifferential profiles (under air, 10 °C/min) of  $H_3PW_{12}O_{40} \cdot xH_2O$  (Sigma-Aldrich) after 1 night under vacuum (<5000 Pa) at room temperature.*

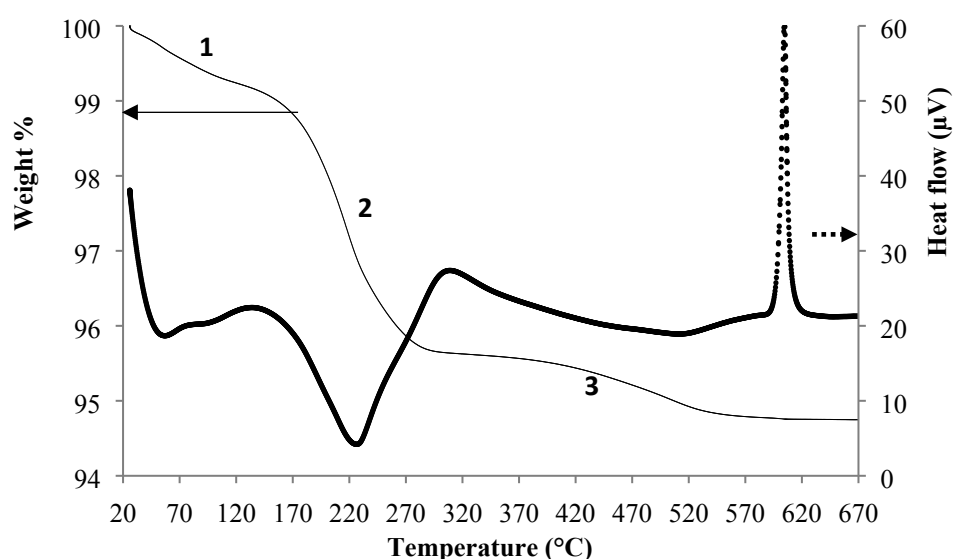

**Fig. S1.** Thermogravimetric (full line) and thermodifferential (dotted line) profiles (under air, 10 °C/min) of  $H_3PW_{12}O_{40} \cdot xH_2O$  (Sigma-Aldrich) after 1 night under vacuum (<5000 Pa) at room temperature.

These profiles allow:

- 1) Determining the number of moles of crystallisation water per mole of  $H_3PW_{12}O_{40}$  Keggin units.**

The powder contains 0.7% of physisorbed water (weight loss 1 on the thermogravimetric profile) and 3.7% of crystallisation water (weight loss 2 on the thermogravimetric profile).

If MM = molar mass [g/mol] and n = number of moles, the number of crystallisation water molecules per Keggin unit (x) in  $H_3PW_{12}O_{40} \cdot xH_2O$  is determined as follows:

$$\text{MM of } H_3PW_{12}O_{40} \cdot xH_2O = \text{MM of } H_3PW_{12}O_{40} + n \text{ of crystallisation } H_2O * \text{MM } H_2O + n \text{ of physisorbed } H_2O * \text{MM } H_2O$$

$$= 2880.05 + x * 18 + y * 18 = 2880.05 + 0.037 * \text{MM of } H_3PW_{12}O_{40} \cdot xH_2O + 0.007 * \text{MM of } H_3PW_{12}O_{40} \cdot xH_2O$$

$$= 2880.05 / (1 - 0.037 - 0.007) = 3012.6 \text{ g/mol.}$$

$x = (0.037 \times 3012.6) / 18 = 6.2$  mol of crystallisation water per mol of  $H_3PW_{12}O_{40}$  Keggin units.

This value of x has been rounded to 6.

**2) Determining the temperature at which  $H_3PW_{12}O_{40}$  has to be pre-treated in order to completely remove its crystallisation water but without losing its acidic protons.**

320 °C has been chosen as the pre-treatment temperature. Indeed, at 320 °C, weight loss 2 on the thermogravimetric profile (related to the loss of crystallisation water) is complete while weight loss 3 (related to the loss of the acidic protons in the form of water) has not yet started. On the thermodifferential profile, the endothermic peak related to weight loss 2 is also complete at 320 °C.

*Thermogravimetric and thermodifferential profiles (under air, 10 °C/min) of  $H_4SiW_{12}O_{40} \cdot xH_2O$  (Sigma-Aldrich) after 1 night under vacuum (<5000 Pa) at room temperature.*

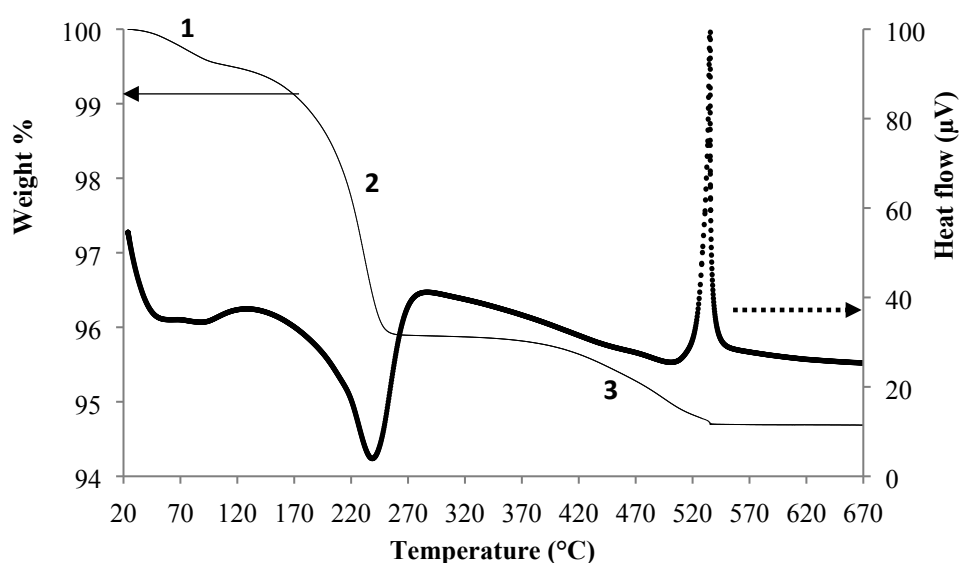

**Fig. S2.** Thermogravimetric (full line) and thermodifferential (dotted line) profiles (under air, 10 °C/min) of  $H_4SiW_{12}O_{40} \cdot xH_2O$  (Sigma-Aldrich) after 1 night under vacuum (<5000 Pa) at room temperature.

These profiles allow:

**1) Determining the number of moles of crystallisation water per mole of  $H_4SiW_{12}O_{40}$  Keggin units.**

The powder contains 0.4% of physisorbed water (weight loss 1 on the thermogravimetric profile) and 3.6% of crystallisation water (weight loss 2 on the thermogravimetric profile).

If MM = molar mass [g/mol] and n = number of moles, the number of crystallisation water molecules per Keggin unit (x) in  $H_4SiW_{12}O_{40} \cdot xH_2O$  is determined as follows:

$$\begin{aligned}
 \text{MM of } H_4SiW_{12}O_{40} \cdot xH_2O &= \text{MM of } H_4SiW_{12}O_{40} + n \text{ of crystallisation } H_2O * \text{MM } H_2O + n \text{ of physisorbed } H_2O * \text{MM } H_2O \\
 &= 2878.17 + x * 18 + y * 18 = 2878.17 + 0.036 * \text{MM of } H_4SiW_{12}O_{40} \cdot xH_2O + 0.004 * \text{MM of } H_4SiW_{12}O_{40} \cdot xH_2O
 \end{aligned}$$

$$= 2878.17 / (1 - 0.036 - 0.004) = 2998.1 \text{ g/mol.}$$

$$x = (0.036 \cdot 2998.1) / 18 = 6 \text{ mol of crystallisation water per mol of H}_4\text{SiW}_{12}\text{O}_{40} \text{ Keggin units.}$$

**2) Determining the temperature at which  $\text{H}_4\text{SiW}_{12}\text{O}_{40}$  has to be pre-treated in order to completely remove its crystallisation water but without losing its acidic protons.**

300 °C has been chosen as the pre-treatment temperature. Indeed, at 300 °C, weight loss 2 on the thermogravimetric profile (related to the loss of crystallisation water) is complete while weight loss 3 (related to the loss of the acidic protons in the form of water) has not yet started. On the thermodifferential profile, the endothermic peak related to weight loss 2 is also complete at 300 °C.

*Raman spectra as a function of time in the region from 2500 to 4000  $\text{cm}^{-1}$  of  $\text{HPW}_{12} \cdot n\text{H}_2\text{O}$  (with  $3 < n < 6$ ) at 150 °C upon exposure to a flow of methanol (10 vol.% in nitrogen).*

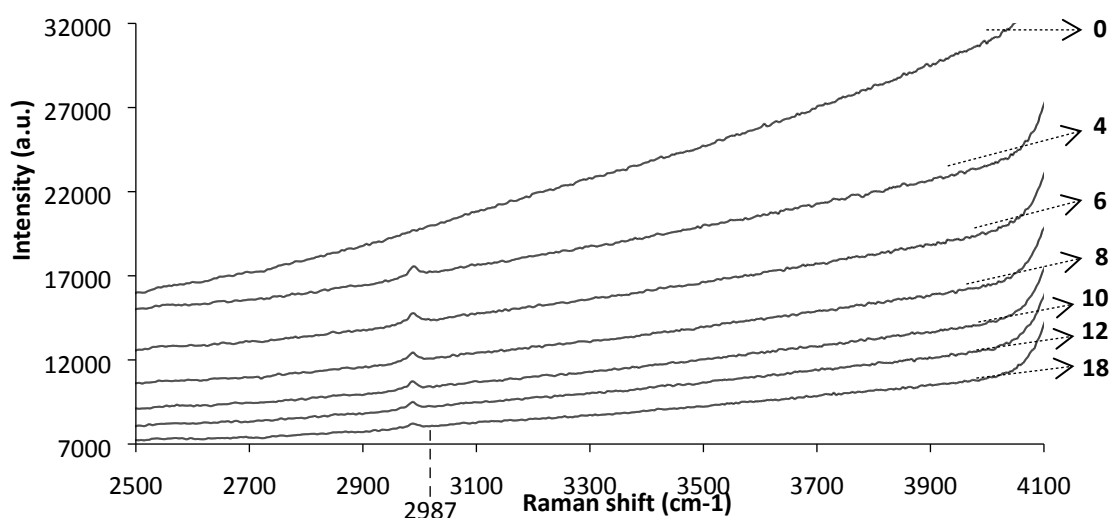

**Fig. S3.** Raman spectra of  $\text{HPW}_{12} \cdot n\text{H}_2\text{O}$  (with  $3 < n < 6$ ) at 150 °C upon exposure to a flow of methanol (10 vol.% in nitrogen) in the region from 2500 to 4000  $\text{cm}^{-1}$  characteristic of C-H and O-H stretches.

A peak at 2987  $\text{cm}^{-1}$  attributed to the symmetric methyl stretch<sup>21</sup> appears as soon as HPW12 gets exposed to methanol, reflecting the latter's adsorption onto the catalyst (not possible to distinguish between surface adsorption and adsorption within the bulk).
